# Supplementary material for: Spatial learning impairments and discoordination of entorhinal-hippocampal circuit coding following prolonged febrile seizures
Source: PubMed Central journal article supplement (PMC10529121; doi:10.1002/hipo.23541), 2023-04-24

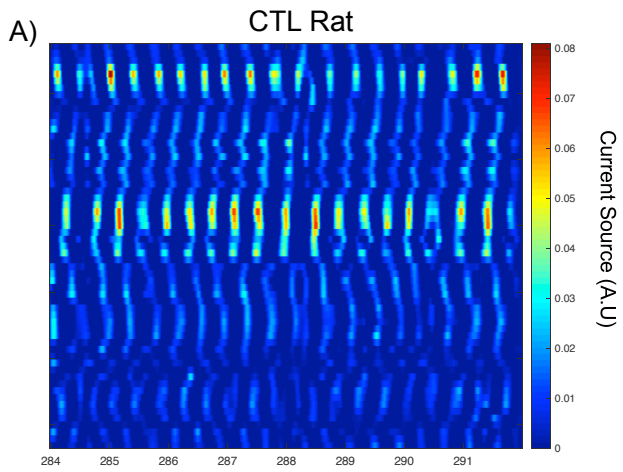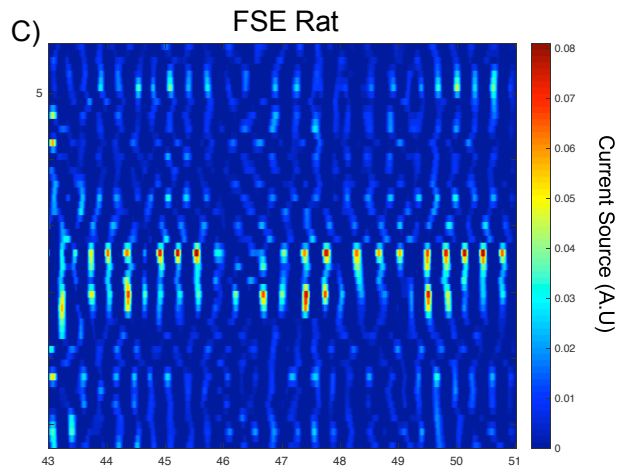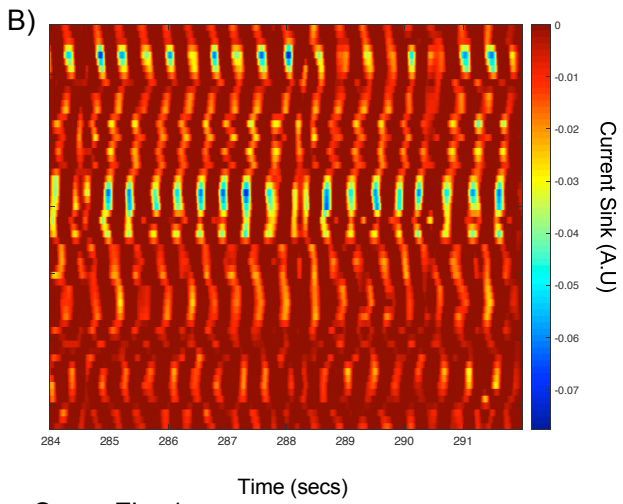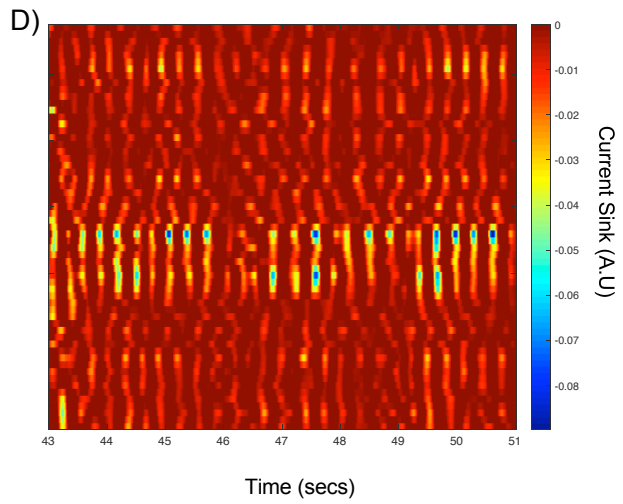

Supp. Fig. 1

# Spontaneous SWR State

A) Filter 0-6000 Hz

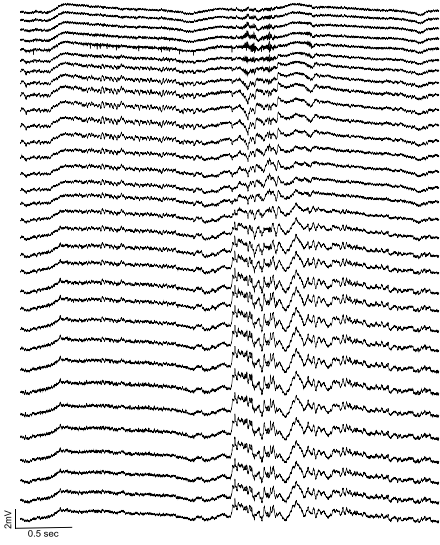

Bi) Filter 140-200 Hz

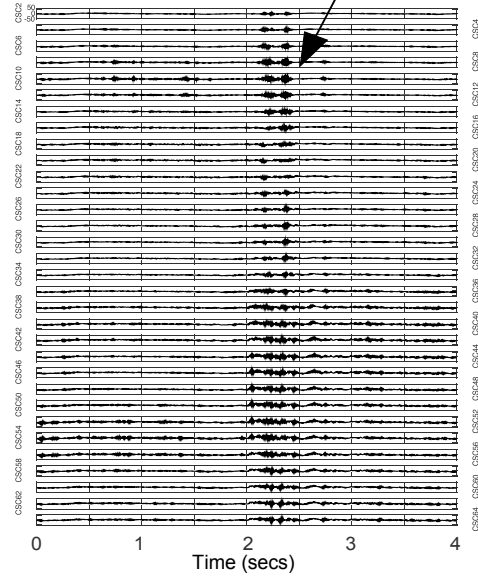

Bii) CSD 140-200 Hz

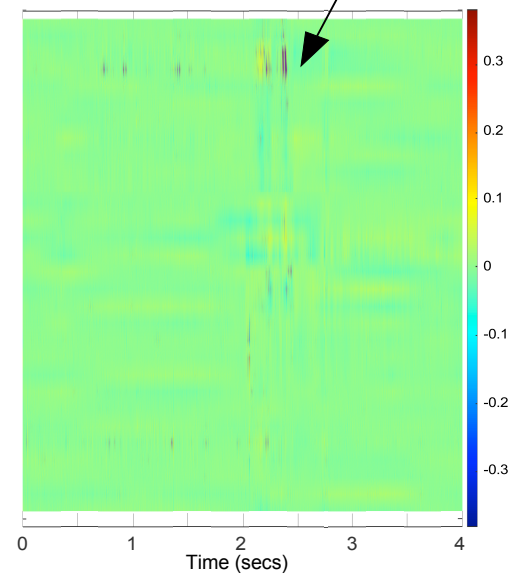

Ci) Post-Tail Pinch Theta State  
Filter 0-6000 Hz

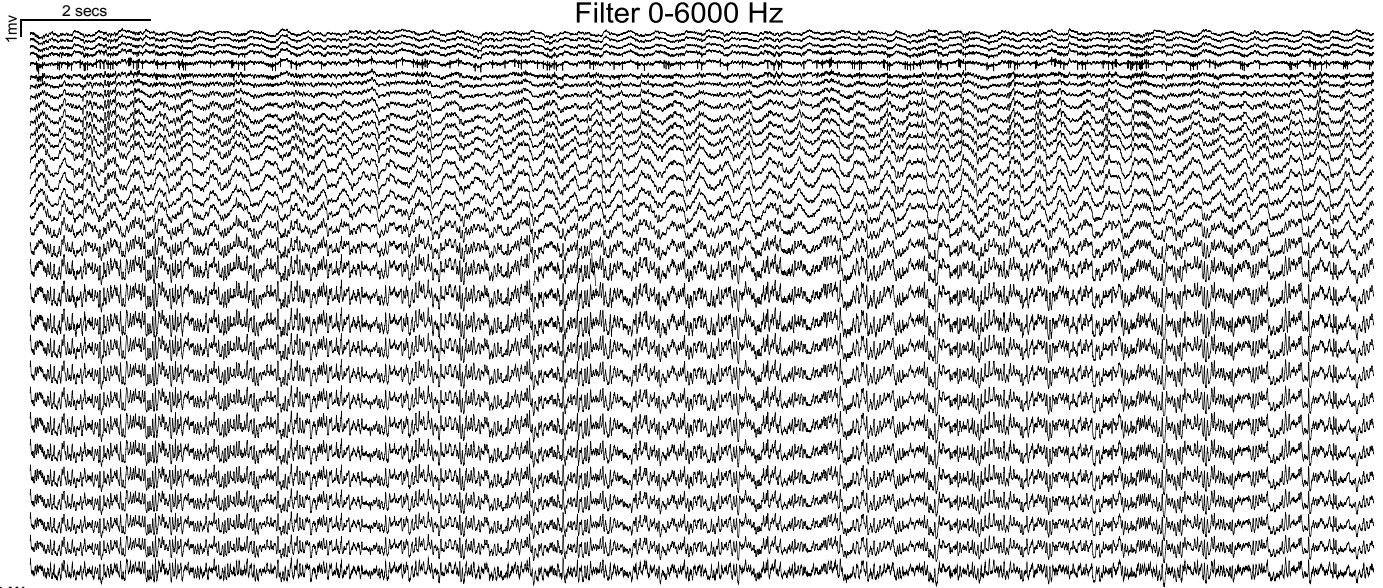

Cii) Filter 1-8 Hz

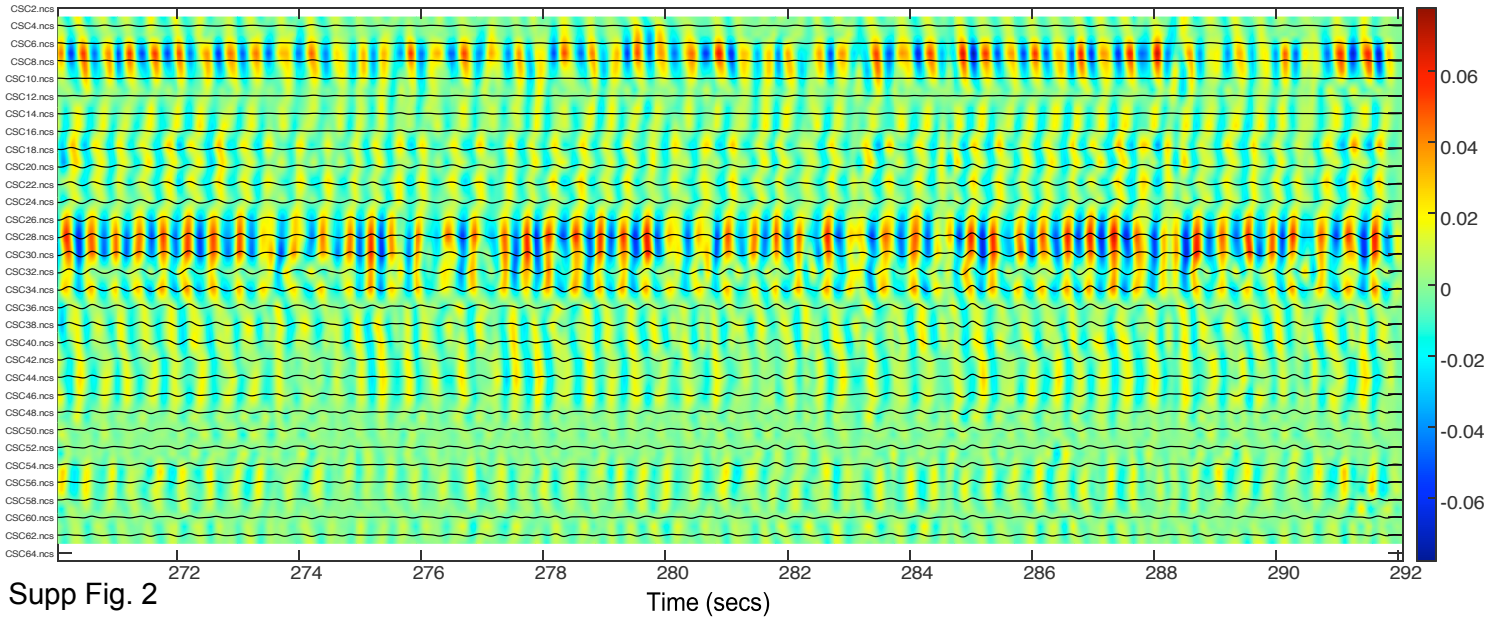



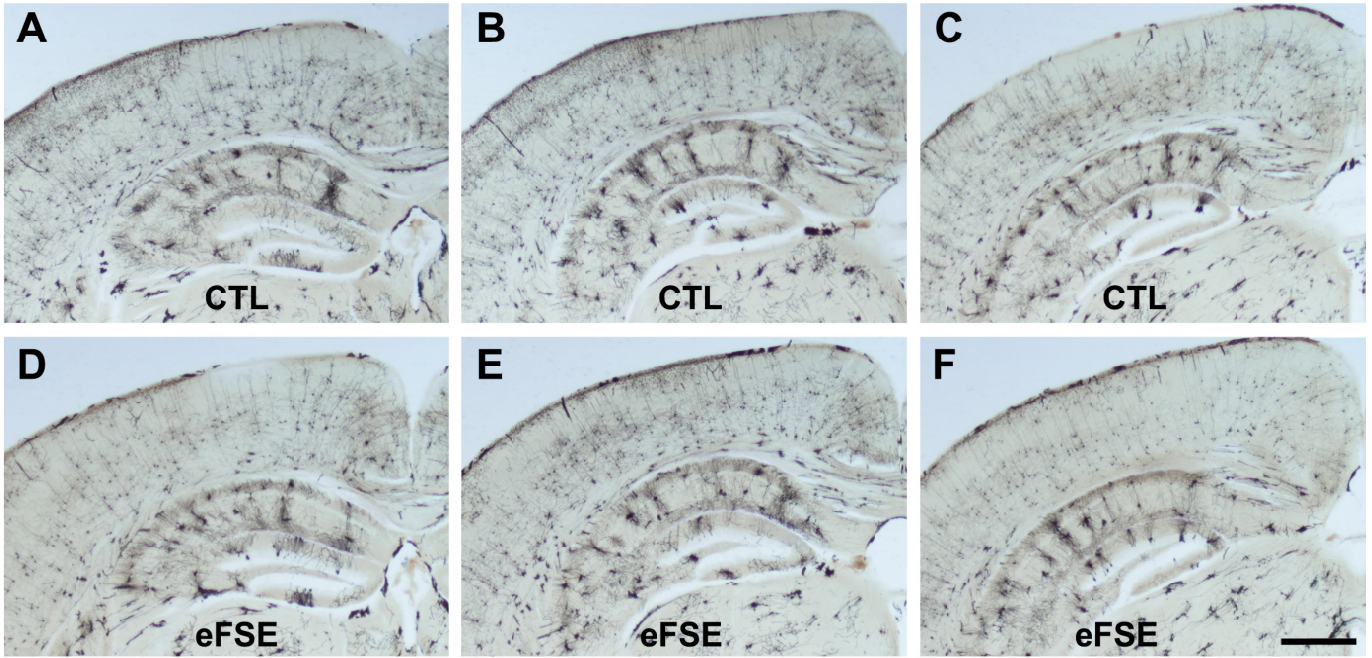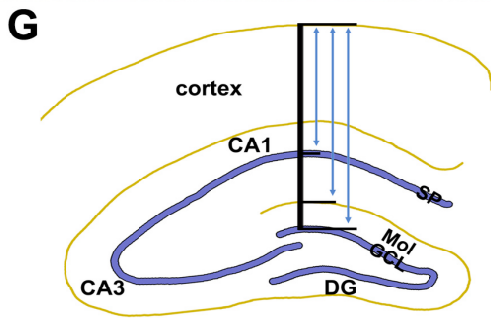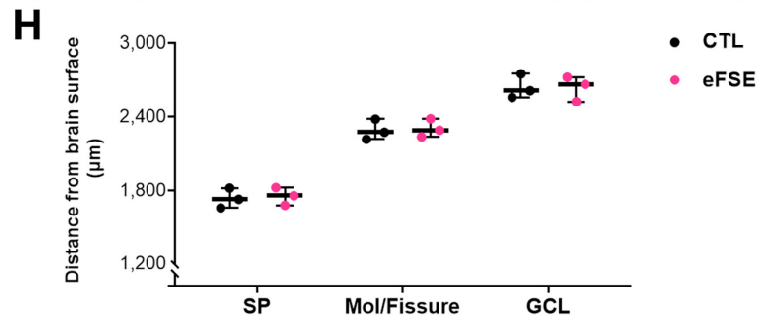

Supp. Fig. 3

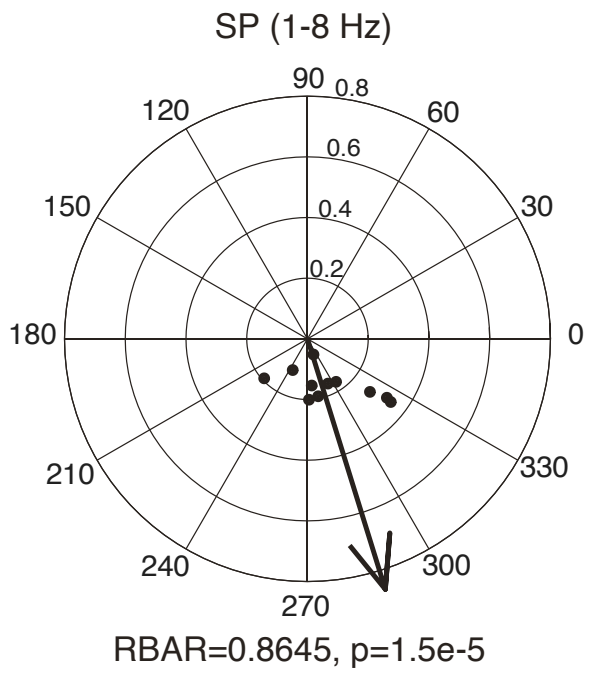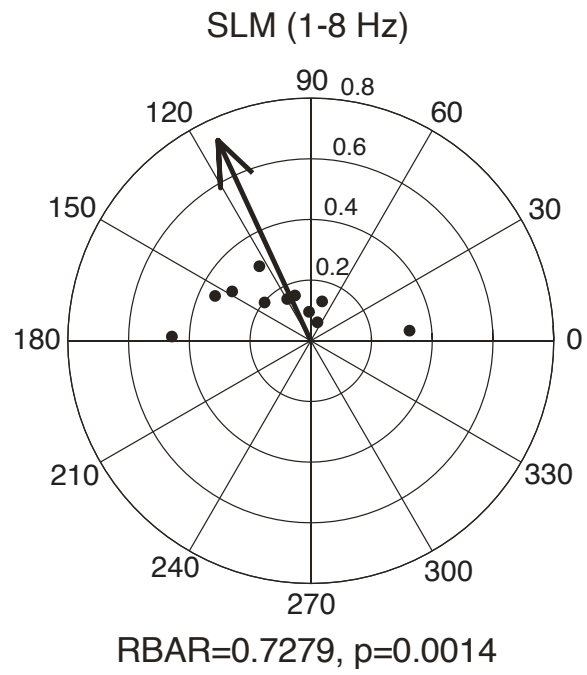

Supp. Fig. 4



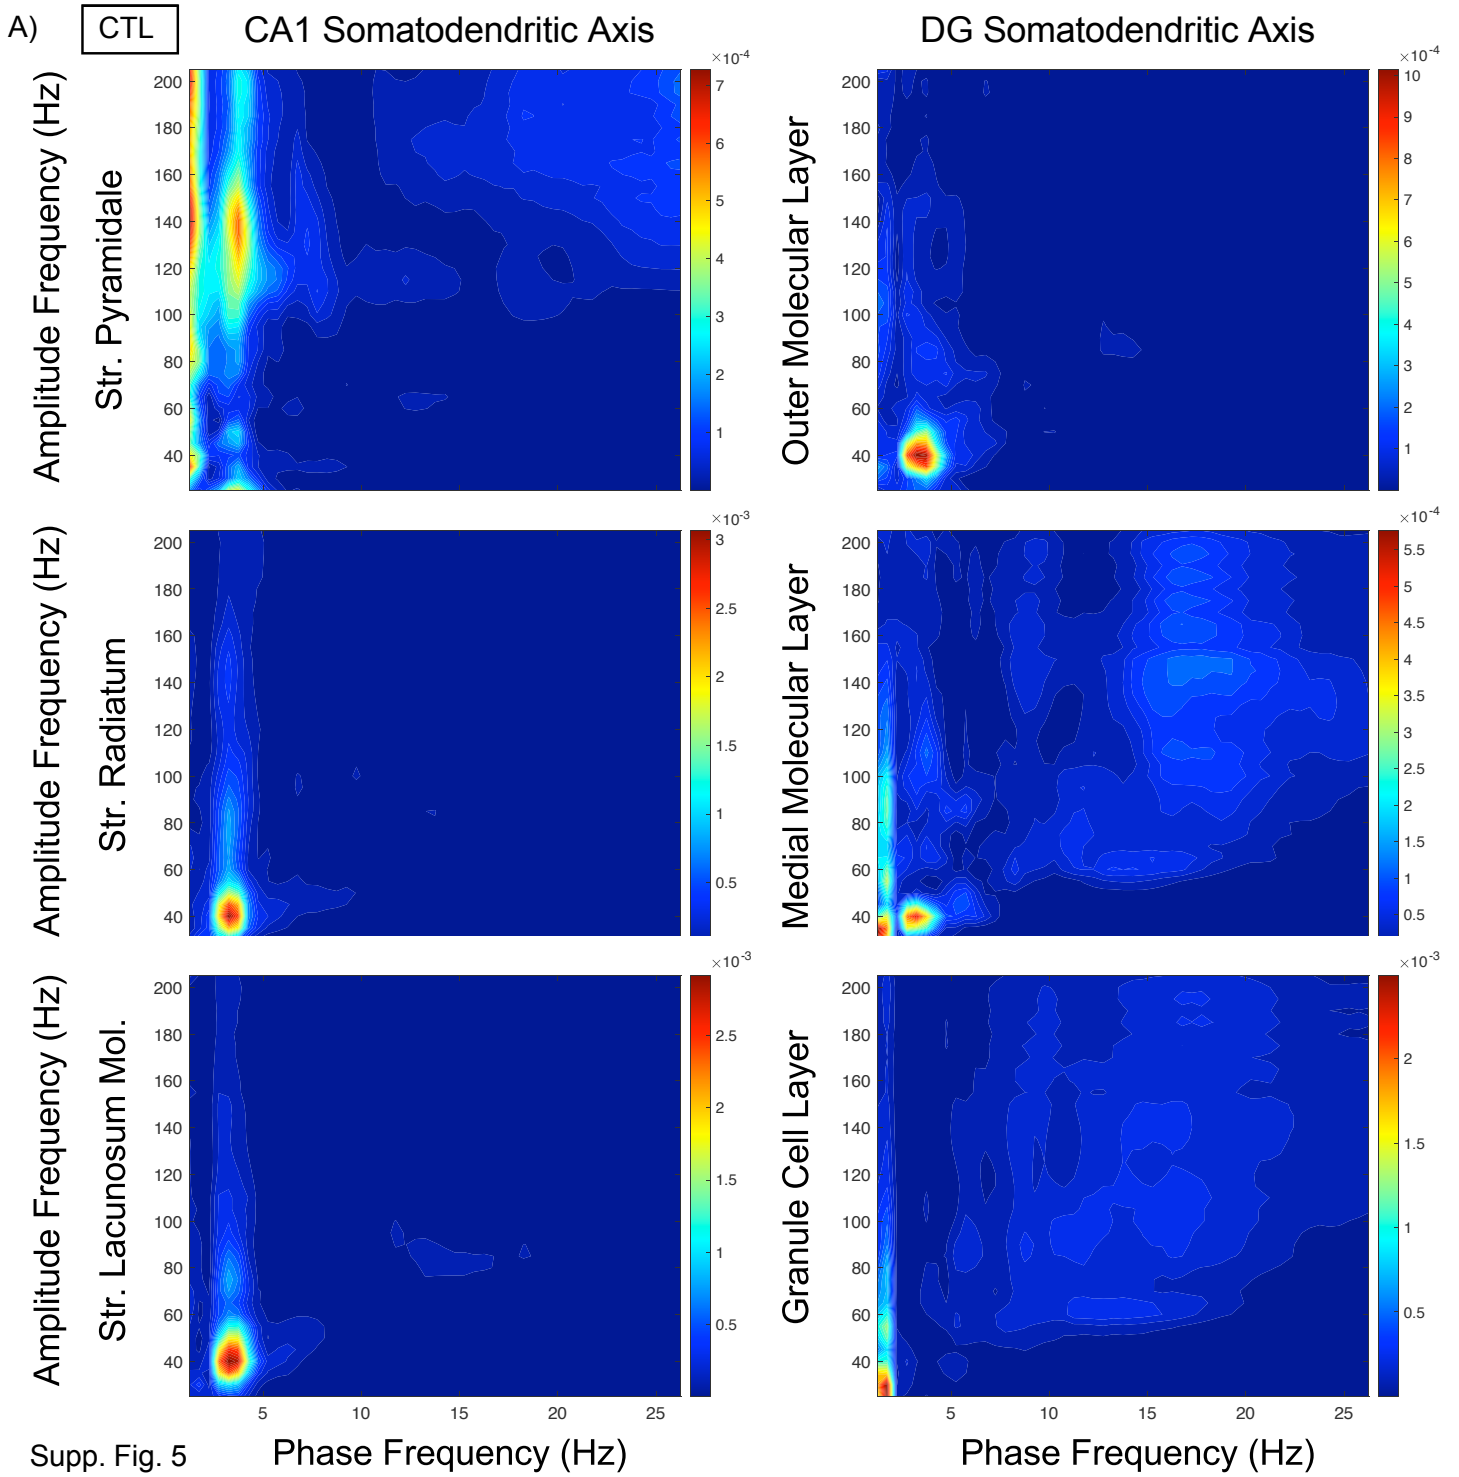

Supplement: NIHMS1913455-supplement-Supplemental_Figures.pdf [file NIHMS1913455-supplement-Supplemental_Figures.pdf]
